# Supplementary material for: Genome-wide mRNA and miRNA expression profiling reveal multiple regulatory networks in colorectal cancer
Source: PubMed Central journal article supplement (PMC4669754; doi:10.1038/cddis.2014.556), 2015-01-22
Supplement: cddis2014556x1.pdf [file cddis2014556x1.pdf]

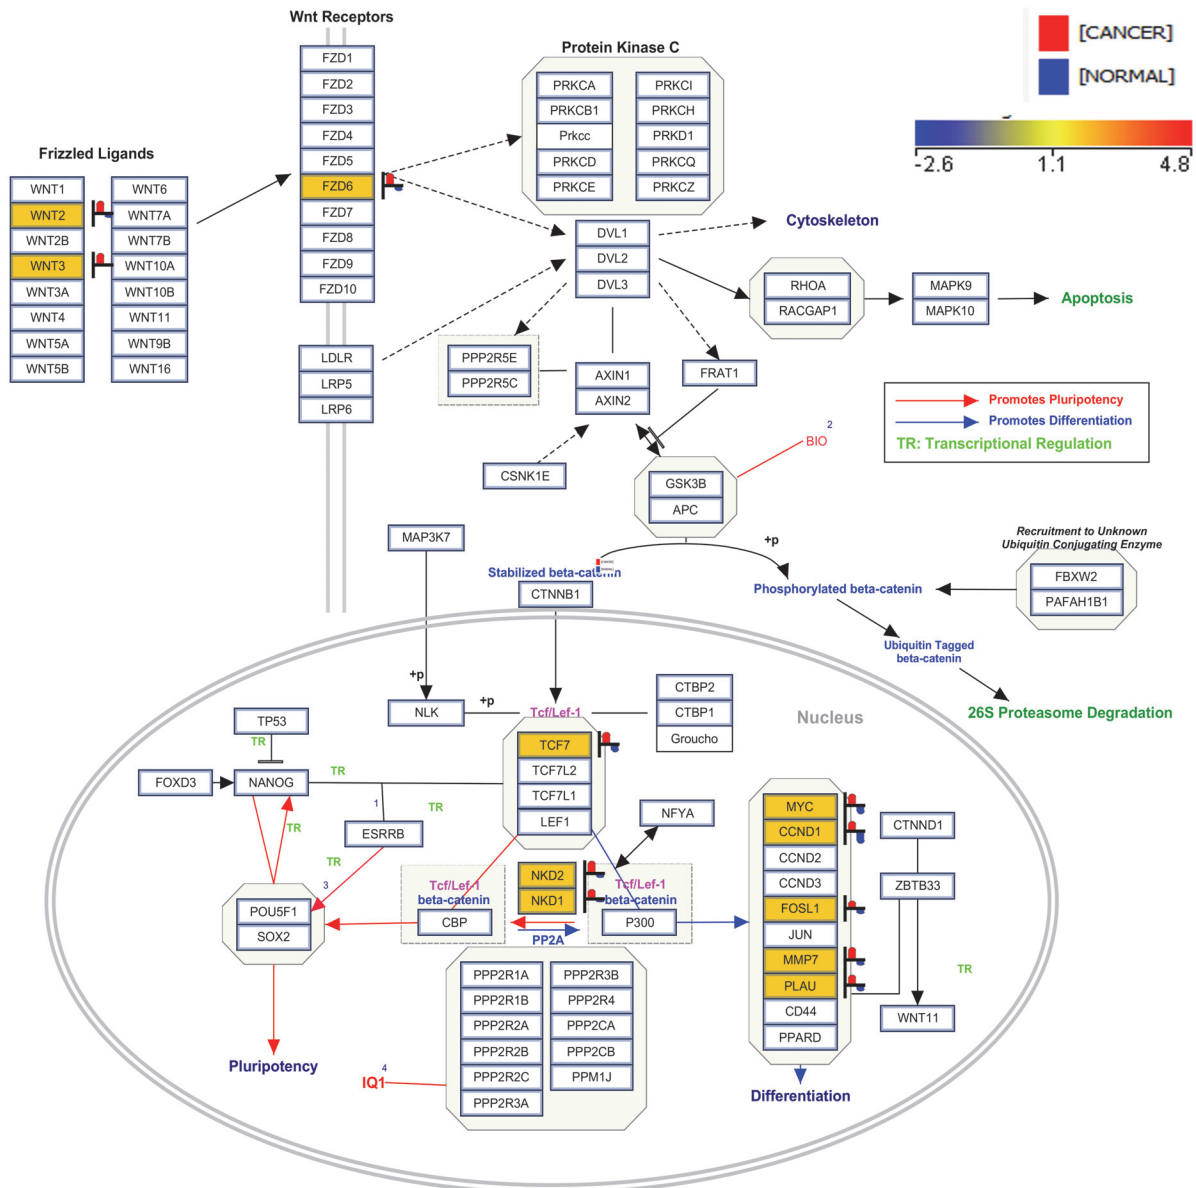

**Supplementary Figure 1.** Illustration of the WNT signaling pathway indicating the matched genes that were upregulated in colorectal cancer.
