# Supplementary material for: Genome-wide mRNA and miRNA expression profiling reveal multiple regulatory networks in colorectal cancer
Source: PubMed Central journal article supplement (PMC4669754; doi:10.1038/cddis.2014.556), 2015-01-22
Supplement: cddis2014556x3.pdf [file cddis2014556x3.pdf]

# HT115

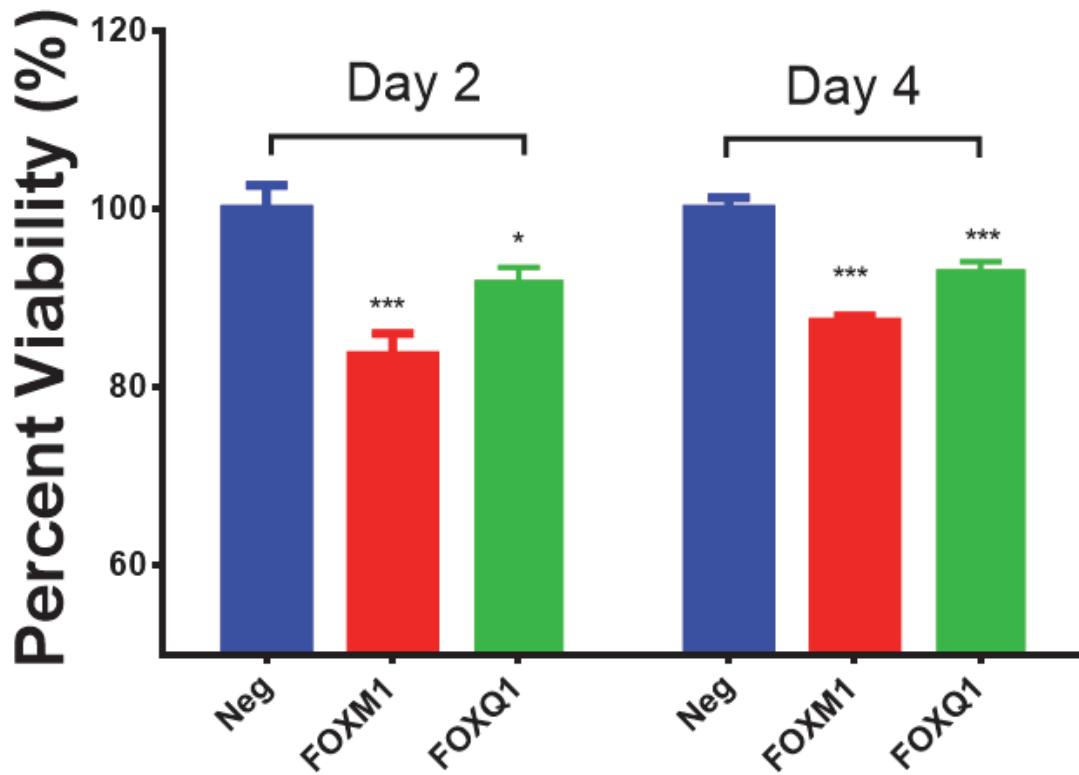

**Supplementary Figure 3.** siRNA-mediated silencing of FOXM1 and FOXQ1 identified in the microarray data reduced HT115 cell growth *in vitro* on days 2 and 4 post transfection (30 nM) with the indicated siRNAs. Data are presented as mean  $\pm$  S.E.M, n= 12.
